# Supplementary material for: AI in HRM: A Unified Model of AI Capabilities and Process Efficiency for Enhanced HRM Effectiveness
Source: Research Square preprint supplement (doi:10.21203/rs.3.rs-7685386/v1), 2025-11-10
Supplement: Supplementary file 1 [file a779ff12469b156144733c98.xlsx]

## Sheet: AI in HRM
AIRS01	AIRS02	AIRS03	AIRS04	AITD01	AITD02	AITD03	AITD04	AIPM01	AIPM02	AIPM03	AIPM04	AISHRP01	AISHRP02	AISHRP03	AISHRP04	AISHRP05	AITAR01	AITAR02	AITAR03	AITAR04	AITAR05	AIEEW01	AIEEW02	AIEEW03	AIEEW04	AIEEW05	HRPE01	HRPE02	HRPE03	HRPE04	DMA01	DMA02	DMA03	DMA04	WAI01	WAI02	WAI03	WAI04	EHRE01	EHRE02	EHRE03	EHRE04	EHRE05
5	5	4	5	4	5	4	5	4	3	4	4	5	4	5	4	4	5	5	5	4	5	4	5	5	5	5	5	5	4	5	4	5	5	2	4	5	5	4	5	5	5	5	5
2	2	2	3	2	2	3	2	2	3	2	2	3	4	4	4	4	4	3	4	4	4	2	4	4	5	5	2	3	2	4	4	4	3	3	3	2	2	2	5	5	5	2	3
5	3	4	4	5	5	5	1	4	5	5	4	1	4	3	3	3	3	3	4	4	4	4	4	4	4	3	4	4	3	4	4	4	4	4	4	4	4	4	5	5	5	5	5
5	5	5	5	2	2	3	2	5	5	5	5	5	1	5	5	1	5	4	3	5	5	5	4	4	3	5	5	5	5	5	5	4	4	5	5	5	2	3	4	5	5	5	2
5	5	5	5	4	4	4	4	4	4	4	4	5	5	4	4	5	4	5	5	5	5	4	4	4	5	4	4	5	4	5	5	5	4	4	5	4	5	5	4	4	4	4	4
2	3	4	5	4	5	5	4	4	3	4	2	2	4	3	2	5	3	4	2	4	3	4	4	5	5	5	5	4	3	4	4	4	4	4	2	5	4	2	4	5	2	4	4
5	5	4	3	3	4	3	3	5	5	4	4	3	3	4	4	5	4	5	4	3	4	3	4	3	4	5	5	3	4	3	3	4	4	4	5	5	4	4	3	3	2	5	4
5	5	5	5	5	5	5	5	5	5	5	5	5	5	5	5	5	5	5	5	4	4	5	5	5	4	4	5	3	4	4	3	3	5	5	4	4	3	3	4	4	4	4	4
5	5	5	5	5	4	5	5	4	4	4	4	5	4	4	4	5	5	4	3	4	4	4	5	5	5	4	5	4	5	4	5	4	5	4	3	4	4	5	4	4	5	5	5
5	4	4	4	4	5	4	4	4	4	4	4	5	5	4	3	3	2	3	3	4	3	4	5	5	5	5	5	5	5	5	3	5	5	4	4	4	3	5	5	4	4	4	4
5	2	5	2	4	1	3	5	2	1	3	2	2	3	4	4	3	4	4	4	5	5	1	2	3	4	5	1	5	2	4	2	3	4	5	4	3	2	1	4	3	2	1	2
5	5	5	5	5	5	5	5	4	4	4	3	5	5	5	5	5	4	5	5	4	4	5	5	5	5	5	5	5	5	4	4	5	5	5	5	5	5	4	5	5	5	5	5
3	3	4	4	4	4	4	5	4	4	5	4	5	5	5	4	5	5	5	4	4	3	4	4	4	2	4	4	5	3	4	3	5	5	5	3	4	4	4	3	5	5	5	5
4	5	5	5	5	5	5	5	5	5	5	4	5	4	4	5	4	4	5	4	4	5	5	4	5	5	5	5	5	5	5	4	5	5	5	4	3	5	4	4	5	5	4	4
5	5	5	5	5	5	5	5	4	4	4	3	3	4	5	4	3	5	5	5	4	4	4	5	5	5	5	4	4	4	5	4	4	4	3	2	2	4	4	3	3	2	3	3
5	5	4	5	5	5	3	4	4	5	4	5	4	4	5	5	4	4	3	4	2	2	3	4	4	4	4	3	4	3	4	4	3	4	3	3	3	4	4	5	5	5	5	5
4	5	5	5	5	5	5	5	4	4	4	4	5	5	5	4	5	5	4	3	4	4	3	4	4	4	3	4	4	4	4	4	3	4	4	4	4	4	4	3	4	4	4	4
4	5	5	5	5	5	5	5	4	4	4	4	1	5	5	2	3	5	5	5	5	4	4	5	5	4	4	4	4	4	4	4	4	4	4	4	4	4	4	3	5	5	5	5
4	4	4	3	3	4	4	4	4	4	3	3	5	5	5	5	5	3	4	4	5	5	4	2	4	4	4	3	5	4	4	5	5	3	4	5	5	5	5	3	3	3	4	4
4	3	2	3	4	3	4	3	3	3	2	2	4	5	5	4	3	4	4	5	4	4	4	3	3	4	3	3	4	4	4	4	4	4	3	4	4	3	4	4	5	5	5	5
4	4	5	5	5	5	5	5	5	3	5	3	5	3	3	3	4	2	2	3	3	3	3	5	5	5	5	3	5	5	5	2	2	2	3	3	5	3	3	5	5	5	5	5
5	5	5	5	5	4	4	4	4	4	3	4	3	3	3	3	4	4	4	4	4	4	4	5	5	4	4	4	4	4	4	4	5	5	5	4	4	4	4	3	4	4	4	4
4	5	5	5	5	5	5	5	5	5	5	5	4	5	5	5	5	5	5	5	5	5	3	5	5	5	5	5	5	5	5	5	5	5	3	5	5	5	5	3	5	5	5	5
3	4	5	3	3	4	4	5	4	3	4	3	3	4	3	3	5	4	4	3	2	4	4	4	5	5	5	4	5	4	5	4	3	3	3	2	1	1	1	4	4	4	4	3
4	4	4	4	4	4	4	4	4	4	4	4	4	4	4	4	4	4	4	4	4	4	4	4	4	4	4	4	4	4	4	4	4	4	4	4	4	4	4	4	4	4	4	4
5	5	5	5	5	5	5	5	4	4	4	4	4	5	5	4	5	5	5	5	5	5	4	5	5	4	5	5	5	5	5	5	5	4	5	5	5	5	5	5	5	5	5	5
5	5	5	5	5	5	5	5	5	5	5	5	4	4	3	4	4	5	5	5	5	4	4	5	5	5	5	5	5	5	5	4	5	5	4	4	5	5	4	5	5	5	5	5
5	5	5	5	5	5	5	5	5	5	4	5	4	4	4	5	4	4	4	4	4	4	5	5	5	5	4	5	4	5	5	3	4	4	4	5	4	5	4	5	5	4	5	4
4	5	5	5	4	4	5	4	5	4	4	4	5	4	4	4	3	5	5	5	5	5	5	4	5	5	4	4	5	4	5	4	5	4	5	5	4	5	5	5	4	5	5	5
5	4	5	5	5	5	5	5	4	3	4	4	4	4	5	4	5	4	5	4	5	5	4	5	3	5	4	4	4	4	5	5	4	5	4	4	5	4	4	4	5	5	4	4
5	5	5	4	5	4	5	4	4	4	4	5	4	4	3	4	5	3	4	5	3	4	3	4	4	4	5	3	4	5	5	5	4	3	4	4	3	5	4	5	5	4	4	5
4	4	4	5	5	4	4	4	4	4	4	4	4	4	4	4	4	4	4	4	4	3	4	4	4	4	4	3	4	4	4	3	4	3	4	3	3	4	3	3	5	5	5	5
5	4	5	4	4	3	5	5	5	4	5	5	1	3	3	4	4	4	5	4	5	4	4	5	4	5	4	5	5	4	5	5	5	4	5	5	5	4	5	5	4	5	5	5
2	4	4	3	3	3	3	3	5	5	5	5	3	3	3	3	3	3	5	5	5	4	4	4	4	4	4	4	4	5	5	4	4	4	4	3	3	2	4	4	4	4	5	5
4	3	3	4	3	4	4	3	2	3	3	4	4	4	4	3	4	4	3	4	3	4	4	4	3	4	3	3	3	4	4	4	4	4	4	4	4	3	5	4	5	5	4	3
5	5	5	5	5	5	5	4	4	4	4	2	4	4	5	3	3	3	4	3	2	5	3	5	3	4	5	4	4	4	3	5	5	5	3	1	2	3	4	4	3	5	5	1
5	5	4	5	4	5	4	5	4	3	4	4	5	4	5	4	4	5	5	5	4	5	4	5	5	5	5	5	5	4	5	4	5	5	2	4	5	5	4	5	5	5	5	5
2	2	2	3	2	2	3	2	2	3	2	2	3	4	3	3	3	3	3	3	3	3	2	4	4	3	3	2	3	2	3	4	4	3	3	3	2	2	2	2	2	3	2	3
3	3	4	4	4	4	4	1	4	4	4	4	1	4	3	3	3	3	3	4	3	3	3	3	3	3	3	4	4	3	4	3	3	3	4	3	3	3	3	3	3	3	3	3
3	2	2	2	2	2	3	2	5	5	3	3	5	1	5	5	1	5	4	3	3	3	5	3	3	3	5	3	3	3	3	5	3	3	5	2	5	2	3	4	3	2	2	2
5	5	5	5	4	4	4	4	5	5	5	5	5	5	4	4	5	4	5	5	5	5	4	4	4	5	4	5	5	4	5	5	5	4	4	5	4	5	5	4	4	4	4	4
2	3	4	5	2	5	5	4	4	3	4	2	2	4	3	2	5	3	4	2	4	3	4	3	3	3	5	5	4	3	4	1	2	3	3	2	5	4	2	4	3	2	4	4
3	3	4	3	3	4	3	3	5	5	4	4	3	3	4	4	5	4	5	4	3	4	3	4	3	4	5	3	3	4	3	3	4	4	4	5	5	4	4	3	3	2	5	4
4	3	3	3	3	3	3	3	3	3	3	3	3	3	3	3	3	3	3	3	3	3	3	3	3	3	4	3	3	4	4	3	3	3	3	3	3	3	3	4	4	3	3	3
4	4	5	5	5	4	5	5	4	4	4	4	5	4	4	4	5	5	4	3	4	4	4	5	5	5	4	5	4	5	4	5	4	5	4	3	4	4	5	4	4	5	5	5
4	4	4	4	4	5	4	4	4	4	4	4	5	5	4	3	3	2	3	3	4	3	4	5	5	5	5	5	5	5	5	3	5	4	4	4	3	3	3	4	4	4	4	4
5	2	5	2	4	1	3	5	2	1	3	2	2	3	4	4	3	4	4	3	5	5	1	2	3	4	5	1	5	2	4	2	3	4	5	4	3	2	1	4	3	2	1	2
5	5	5	5	5	5	5	5	4	4	4	3	5	5	5	5	5	4	5	5	4	4	5	5	5	5	5	5	5	5	4	4	5	5	5	5	5	5	4	5	5	5	5	5
3	3	4	4	4	4	4	5	4	4	5	4	5	5	5	4	4	4	3	4	4	3	4	4	4	2	4	4	5	3	4	3	4	4	4	3	4	4	4	3	4	3	4	5
4	5	5	5	5	5	5	5	5	5	5	4	5	4	4	5	4	4	5	4	4	5	5	4	5	5	5	5	5	5	5	4	5	5	5	4	3	5	4	4	5	5	4	4
5	5	5	5	5	5	5	5	4	4	4	3	3	4	5	4	3	5	5	5	4	4	4	5	5	5	5	4	4	4	5	3	3	3	3	2	2	3	3	3	3	2	3	3
4	2	4	4	4	4	3	4	4	5	4	5	4	4	5	5	4	4	3	4	2	2	3	4	4	4	4	3	4	3	4	4	3	4	3	3	3	4	4	3	4	2	4	4
4	4	3	4	5	3	3	4	4	4	4	4	5	5	5	4	5	5	4	3	4	4	3	4	4	4	3	4	4	4	4	4	3	3	3	4	4	4	4	3	4	4	4	4
3	3	3	3	3	3	3	3	3	3	3	3	1	2	2	2	3	3	3	4	3	4	2	5	5	4	4	3	3	4	4	2	3	2	2	3	3	2	2	3	2	2	2	2
4	4	4	3	3	4	4	4	4	4	3	3	5	5	5	5	5	3	4	4	4	4	4	2	4	4	4	3	5	4	4	4	4	3	4	4	3	4	4	3	3	3	4	4
4	3	2	3	4	3	4	3	3	3	2	2	4	5	5	4	3	4	4	5	4	4	4	3	3	4	3	3	4	4	4	4	4	4	3	4	4	3	4	4	4	4	3	3
4	4	3	5	5	5	5	5	5	3	5	3	5	3	3	3	4	2	2	3	3	3	3	4	5	4	4	3	4	3	3	2	2	2	3	3	5	3	3	3	5	3	2	3
3	3	3	3	3	3	3	3	4	4	3	4	3	3	3	3	4	4	4	4	4	4	3	3	3	4	4	4	4	4	4	3	3	3	3	4	4	4	4	3	4	4	4	4
4	5	5	5	5	5	5	5	5	5	5	5	4	5	5	5	5	5	5	5	5	5	3	5	5	5	5	5	5	5	5	5	5	5	3	5	5	5	5	3	5	5	5	5
3	4	5	3	3	4	4	5	4	3	4	3	3	4	3	3	5	4	4	3	2	4	4	4	5	5	5	4	5	4	5	4	3	3	3	2	1	1	1	4	4	4	4	3
4	4	4	4	4	4	4	4	4	4	4	4	4	4	4	4	4	4	4	4	4	4	4	4	4	4	4	4	4	4	4	4	4	4	4	4	4	4	4	4	4	4	4	4
5	5	5	5	5	5	5	5	4	4	4	4	4	5	5	4	5	5	5	5	5	5	4	5	5	4	5	5	5	5	5	5	5	4	5	5	5	5	5	5	5	5	5	5
5	5	5	5	5	5	5	5	5	5	5	5	4	4	3	4	4	5	5	5	5	4	4	5	5	5	5	5	5	5	5	4	5	5	4	4	5	5	4	5	5	5	5	5
5	5	5	5	5	5	5	5	5	5	4	5	4	4	4	5	4	4	4	4	4	4	5	5	5	5	4	5	4	5	5	3	4	4	4	5	4	5	4	5	5	4	5	4
4	5	5	5	4	4	5	4	5	4	4	4	5	4	4	4	3	5	5	5	5	5	5	4	5	5	4	4	5	4	5	4	5	4	5	5	4	5	5	5	4	5	5	5
5	4	5	5	5	5	5	5	4	3	4	4	4	4	5	4	5	4	5	4	5	5	4	5	3	4	4	4	4	4	5	5	4	5	4	4	5	4	4	4	5	5	4	4
4	5	4	4	5	4	5	4	4	3	4	4	4	4	3	4	5	3	4	5	3	4	3	4	4	4	4	3	4	4	4	5	4	3	4	4	3	5	4	4	4	4	4	5
4	4	4	5	5	4	4	4	4	4	4	4	4	4	4	4	4	4	4	4	4	3	4	4	4	4	4	3	4	4	4	3	4	3	4	3	3	4	3	3	4	4	4	4
5	4	5	4	4	3	5	5	5	4	5	5	1	3	3	4	4	4	5	4	5	4	4	5	4	5	4	5	5	4	5	5	5	4	5	5	5	4	5	5	4	5	4	5
2	3	3	3	3	3	3	3	3	3	3	3	3	3	3	3	3	3	2	2	4	4	3	3	3	3	3	4	3	3	3	3	3	3	3	3	3	2	3	3	2	4	3	3
4	3	3	4	3	4	4	3	2	3	3	4	3	4	4	3	4	4	3	4	3	4	4	4	3	4	3	3	3	4	4	4	4	4	4	4	4	3	3	4	5	5	4	3
2	2	2	2	1	1	2	1	1	2	1	2	4	4	5	3	3	3	4	3	2	5	3	5	3	4	5	1	1	1	3	5	5	5	3	1	2	3	4	4	3	5	5	1
4	4	4	4	4	4	4	4	4	4	3	4	4	5	5	4	5	3	3	3	4	4	4	4	3	4	4	4	4	3	4	5	4	4	4	4	4	4	3	4	4	4	4	4
5	4	4	5	4	5	4	4	5	4	4	5	4	5	4	5	4	4	5	5	4	3	3	5	4	5	5	5	5	5	5	4	4	5	5	4	5	5	5	4	3	5	4	5
4	4	4	4	4	4	4	4	4	4	4	4	4	3	4	4	4	4	4	4	3	4	4	5	4	4	4	4	4	4	4	4	4	4	4	3	4	4	4	4	4	4	4	4
4	4	4	4	3	5	3	3	3	4	4	3	4	3	3	3	3	3	3	3	3	4	3	3	3	4	3	3	4	5	5	5	5	3	3	2	2	3	2	3	3	4	3	5
1	4	5	5	5	4	5	5	5	4	4	3	5	5	5	5	5	5	5	5	5	5	3	2	1	4	2	2	2	1	1	5	5	5	5	5	5	5	5	3	2	5	2	1
3	5	5	4	4	4	4	3	4	3	4	3	4	4	4	3	3	5	3	4	2	3	4	4	3	3	4	3	4	4	4	3	4	3	3	3	3	4	3	4	4	4	4	4
3	4	4	3	4	3	3	3	4	4	4	3	3	3	4	4	4	3	4	4	4	4	2	3	3	4	4	4	3	3	4	4	5	4	4	4	4	3	3	3	3	3	4	4
4	4	4	4	4	4	4	4	3	4	4	4	4	4	5	4	4	5	4	4	3	4	3	4	4	4	4	4	4	4	4	4	4	5	4	4	4	4	3	4	4	4	5	5
3	3	3	3	3	3	3	3	3	2	2	3	4	3	3	3	3	4	3	2	2	2	2	2	2	3	5	2	2	3	2	1	2	1	1	2	4	3	2	3	4	3	3	2
4	4	4	4	5	5	3	5	5	4	4	4	4	4	5	4	4	5	5	5	4	4	4	5	3	5	4	5	5	5	5	3	4	3	4	3	4	5	3	4	5	3	4	4
3	3	3	3	3	3	3	3	3	3	3	3	3	3	3	3	3	3	3	4	3	4	3	3	3	4	4	3	3	3	3	3	3	3	2	3	3	3	3	4	4	3	3	3
5	5	5	5	5	5	5	5	5	5	5	5	5	5	5	5	5	5	5	5	5	5	5	5	5	5	5	5	5	5	5	5	5	5	5	5	5	5	5	5	5	5	5	5
5	4	3	4	5	3	4	4	5	5	4	4	5	5	4	5	4	5	5	4	4	4	4	4	4	4	5	4	4	4	4	4	4	4	4	4	4	5	4	4	4	4	4	4
4	4	4	4	4	4	4	4	4	4	5	4	5	3	4	3	4	4	5	5	4	4	4	5	5	5	5	4	5	4	4	3	3	4	5	3	4	4	3	4	4	4	3	4
5	5	5	5	5	5	5	5	5	5	4	5	5	5	5	5	5	5	5	5	5	5	5	5	5	5	5	5	5	5	5	5	5	5	5	5	5	5	5	5	5	5	5	5
4	4	4	4	4	4	3	4	3	3	3	3	4	4	5	4	4	2	2	4	4	4	3	5	3	4	5	4	4	3	5	2	4	3	4	3	2	3	2	4	3	3	4	3
5	5	5	5	5	5	5	5	5	5	5	5	5	5	5	5	1	5	5	5	5	5	5	5	5	5	5	5	5	5	5	5	5	5	5	5	5	5	5	5	5	5	5	5
3	4	4	4	3	3	2	3	3	4	2	4	1	2	3	1	2	2	1	2	1	4	5	3	3	3	3	3	3	3	3	3	2	3	2	2	5	3	2	4	3	4	4	3
4	4	4	3	3	4	3	4	4	4	3	3	4	5	4	2	3	4	4	5	1	4	4	4	4	4	4	4	4	4	4	5	4	4	3	3	3	4	3	4	1	2	2	4
4	4	4	4	4	4	4	4	4	4	5	3	5	5	5	3	5	3	3	3	3	4	4	4	5	5	5	4	4	4	4	5	4	3	4	3	5	4	4	4	3	3	4	4
5	3	3	4	5	5	5	5	4	4	4	4	4	4	4	3	3	4	3	4	3	4	4	5	5	5	5	4	4	3	4	4	3	5	4	3	4	5	5	3	4	4	4	4
4	5	4	4	4	4	5	4	4	5	4	4	4	4	4	5	4	3	4	4	4	4	5	4	5	4	4	4	5	4	4	4	5	4	4	5	4	4	5	4	4	5	4	4
4	4	4	4	4	4	4	4	4	4	4	4	4	4	4	4	3	4	4	4	4	4	4	4	4	4	4	4	4	4	4	4	4	4	4	4	4	4	4	4	4	4	4	4
5	5	5	4	4	5	5	4	5	4	5	4	4	4	3	4	4	5	4	5	4	5	4	4	3	4	4	4	4	5	4	4	4	2	4	3	2	4	5	4	5	4	4	4
5	5	5	5	5	5	5	5	4	4	5	4	4	4	4	3	3	4	4	5	3	5	4	4	4	4	4	5	5	4	5	5	4	3	4	3	4	4	3	4	4	4	5	4
5	5	5	5	5	5	5	5	5	5	5	5	5	5	5	5	5	5	5	5	5	5	5	5	5	5	5	5	5	5	5	5	5	5	5	5	5	5	5	5	5	5	5	5
3	2	3	3	3	1	1	1	2	3	3	2	1	1	1	1	1	1	1	2	1	1	2	3	2	2	2	2	2	3	3	2	2	2	2	3	3	3	2	3	3	1	3	3
4	4	4	4	4	4	4	4	4	4	4	3	4	4	5	4	4	4	4	4	3	4	4	5	5	4	4	4	4	4	4	4	4	4	4	4	5	4	4	5	4	4	4	4
3	3	3	2	4	4	2	2	3	2	2	3	1	3	3	2	5	2	3	5	4	3	3	5	2	2	2	2	5	2	2	2	3	2	2	2	2	2	1	2	3	2	2	3
5	5	5	5	5	5	5	5	5	5	5	5	5	5	5	5	5	5	5	5	5	5	5	5	5	5	5	5	5	5	5	5	5	5	5	5	5	5	5	5	5	5	5	5
5	5	5	5	5	5	5	5	5	5	5	5	5	5	5	5	5	5	5	5	5	5	5	5	5	5	5	5	5	5	5	5	5	5	5	5	5	5	5	5	5	5	5	5
5	5	5	5	5	5	5	5	5	5	5	5	5	5	5	5	5	5	5	5	5	5	5	5	5	5	5	5	5	5	5	5	5	5	5	5	5	5	5	5	5	5	5	5
3	3	2	3	3	4	5	3	4	3	3	4	2	3	4	5	4	4	4	3	4	3	4	5	4	4	4	3	2	4	4	3	2	3	2	3	2	3	3	3	4	3	3	3
5	5	5	5	5	5	5	5	5	5	5	5	5	5	5	5	5	5	5	5	5	5	5	5	5	5	5	5	5	5	5	5	5	5	5	5	5	5	5	5	5	5	5	5
5	5	5	5	5	5	5	5	5	5	5	5	5	5	5	5	5	5	5	5	5	5	5	5	5	5	5	5	5	5	5	5	5	5	5	5	5	5	5	5	5	5	4	4
5	5	4	5	5	4	5	5	4	5	4	4	5	4	4	4	5	5	5	4	4	5	5	4	5	4	5	5	5	5	5	5	4	5	4	4	5	4	5	4	4	5	5	5
5	5	5	5	5	5	5	5	5	4	5	4	5	4	5	5	4	5	5	5	5	5	4	4	5	5	5	5	5	5	5	4	4	4	4	5	4	5	4	5	5	5	5	4
4	4	5	5	5	5	5	4	5	5	5	5	5	5	5	4	4	5	4	5	4	4	5	5	5	5	5	5	5	5	4	5	4	5	5	5	5	5	5	5	5	5	5	5
4	5	5	4	4	5	5	5	5	4	5	4	5	5	5	5	5	5	5	5	4	4	5	5	4	5	5	5	5	4	4	4	4	5	5	5	4	5	5	4	5	5	5	5
5	5	5	5	5	5	5	5	4	5	4	5	5	4	4	4	4	4	5	5	5	5	5	4	5	5	4	4	4	5	5	4	5	4	5	5	5	5	5	5	5	4	4	5
5	5	5	5	5	4	4	5	5	4	4	4	5	5	5	5	5	5	5	5	5	5	5	4	5	4	5	5	5	5	4	4	5	5	4	5	4	5	5	4	4	5	4	5
4	5	5	4	5	5	4	5	5	4	5	5	5	5	4	4	5	4	5	4	5	4	5	4	5	4	5	5	5	5	4	5	5	5	5	4	5	5	5	5	5	5	5	5
5	5	5	5	5	5	5	5	5	5	5	5	5	5	5	5	5	5	5	5	5	5	5	5	5	5	5	4	4	5	5	5	5	5	5	5	5	5	5	5	5	5	5	5
5	5	5	5	4	5	5	5	5	5	5	5	5	5	5	5	5	5	5	5	5	5	5	5	5	5	5	5	5	5	5	5	5	5	5	5	5	5	5	5	5	5	5	5
5	5	5	5	5	5	5	5	5	5	5	5	5	5	5	5	5	5	5	5	5	5	5	5	5	5	5	5	5	5	5	5	5	5	5	5	5	5	5	5	5	5	5	5
5	5	5	5	5	5	4	5	4	5	5	5	5	5	5	5	5	5	5	5	5	5	5	4	5	4	5	5	5	4	4	5	5	5	5	5	5	5	5	4	5	4	4	5
4	4	5	4	5	4	5	4	5	5	4	5	5	5	5	5	5	5	5	5	5	4	5	5	5	5	5	4	5	4	4	5	5	5	5	5	5	5	5	5	5	5	5	5
5	4	5	4	5	5	5	5	4	5	4	5	5	5	5	5	5	5	5	5	5	5	5	5	5	5	5	5	4	5	4	5	5	5	5	5	5	5	5	5	5	5	5	4
5	5	4	5	5	5	5	5	5	5	5	5	5	5	5	5	5	5	5	5	5	5	4	5	5	5	5	5	5	5	5	5	5	4	5	5	5	5	5	5	5	5	5	5
5	5	5	5	5	5	5	5	5	5	5	5	5	5	5	5	5	5	5	5	5	5	5	5	5	5	5	5	5	5	5	5	5	5	5	5	5	5	5	5	5	5	5	5
5	5	5	5	5	5	5	5	5	5	5	5	5	5	5	5	5	5	5	5	5	5	5	5	5	5	5	5	5	5	5	5	5	5	5	5	5	5	5	5	5	5	5	5
5	5	5	5	5	5	5	5	5	5	5	5	5	5	5	5	5	5	5	5	5	5	5	5	5	5	5	5	5	5	5	5	5	5	5	5	5	5	5	5	5	5	5	5
2	4	2	4	1	2	4	3	1	1	3	4	2	3	2	3	4	5	1	2	5	2	1	4	2	3	5	4	3	2	4	5	1	2	2	3	4	3	3	5	4	3	2	3
2	4	5	3	5	4	5	5	4	4	3	4	4	4	4	3	2	1	2	3	5	5	2	3	3	2	4	5	3	5	2	2	1	2	3	5	5	4	3	4	3	5	5	5
4	4	3	4	3	5	5	5	4	3	3	3	3	3	2	4	5	5	2	1	2	3	2	3	4	3	4	4	3	4	4	4	4	4	2	4	4	3	3	4	4	4	4	4
4	5	5	3	2	4	3	5	5	5	5	5	4	4	3	4	3	2	3	3	2	4	3	3	2	5	5	5	5	5	4	3	5	5	2	3	5	5	5	5	4	2	4	4
4	5	4	3	5	5	4	5	4	3	3	3	5	3	5	4	5	3	2	3	4	4	5	4	4	4	5	4	5	5	4	3	4	4	5	5	3	4	3	4	5	5	5	5
4	4	4	4	3	4	5	5	3	2	5	5	3	4	2	2	5	5	5	5	5	4	5	5	5	5	4	5	3	5	5	5	4	5	5	3	3	5	4	3	5	5	5	5
4	4	5	5	5	5	5	5	5	5	5	5	5	5	5	5	4	4	5	3	5	4	5	5	4	3	4	5	4	4	4	3	5	4	4	5	5	4	4	5	5	5	5	5
5	4	4	4	5	5	5	5	5	5	5	4	5	5	5	4	5	5	3	3	3	5	4	4	5	5	5	4	5	5	5	4	4	4	4	4	5	3	4	4	4	4	4	3
5	4	5	5	5	4	5	5	5	5	5	5	4	3	3	4	4	5	5	5	5	5	4	4	4	4	4	5	5	4	3	5	4	4	4	4	4	4	3	5	5	5	5	5
4	4	5	5	5	5	5	5	3	4	4	4	5	5	4	5	4	4	5	5	5	4	4	4	5	5	5	4	5	5	5	5	4	4	4	4	5	5	5	5	5	5	5	4
5	4	4	3	4	4	4	4	3	3	4	5	4	4	5	5	3	4	4	4	4	5	4	5	5	5	5	5	5	5	5	5	5	5	4	4	4	4	5	4	4	3	4	4
5	5	5	5	4	4	5	5	5	5	5	5	5	4	5	4	4	5	5	5	5	5	4	4	5	5	5	5	3	4	4	2	2	2	4	4	3	2	1	5	3	4	4	4
4	4	5	4	4	5	5	4	4	5	5	5	5	5	4	3	5	3	4	5	5	4	4	5	5	5	5	3	4	4	5	5	4	5	4	4	4	5	5	4	3	4	4	4
5	5	4	5	5	4	4	5	5	5	5	5	5	5	4	5	5	4	5	5	5	5	5	5	5	5	5	5	5	4	4	4	4	4	4	5	4	4	4	5	5	4	4	4
5	4	5	5	4	5	5	5	4	4	4	4	5	5	5	5	5	5	5	5	5	4	5	4	5	5	5	5	5	5	5	4	5	5	4	4	5	4	5	4	4	4	4	4
4	4	4	4	4	4	4	4	5	5	3	4	4	5	5	3	3	2	4	3	5	3	4	5	5	5	4	5	5	5	5	5	3	5	4	4	5	3	5	4	5	3	5	4
4	3	4	5	5	5	5	5	4	5	5	4	4	4	4	4	4	5	5	5	5	5	4	5	5	5	5	5	5	5	4	5	4	5	4	4	4	5	4	5	5	4	4	4
4	4	3	4	3	5	5	5	5	5	5	3	4	5	5	4	5	3	5	5	5	4	4	4	5	5	5	4	3	2	4	5	5	5	5	5	5	5	5	5	4	3	4	4
5	4	4	4	4	4	4	5	5	5	4	4	5	4	4	5	5	4	4	4	4	5	4	4	5	5	5	4	4	4	4	5	5	5	4	4	4	4	5	5	5	4	4	5
5	5	5	5	5	5	5	4	5	5	5	4	5	5	4	4	4	5	5	5	5	5	5	5	5	4	4	5	5	5	5	4	5	5	5	4	5	5	5	4	4	5	5	5
5	5	5	4	4	5	4	5	3	3	5	5	5	5	4	5	4	5	5	5	4	5	3	4	3	4	5	5	5	4	5	4	5	5	4	5	5	5	4	4	4	4	4	4
5	5	5	4	5	5	5	5	5	5	5	5	5	5	4	3	5	5	5	5	5	5	5	5	4	5	5	5	5	5	3	5	5	5	5	3	5	5	5	4	4	4	4	4
5	5	5	5	5	5	5	5	5	5	5	5	5	5	5	5	5	5	5	5	5	5	5	5	5	5	5	5	5	5	5	5	5	5	5	5	5	5	5	5	5	5	5	4
3	5	3	5	4	5	5	5	5	5	5	4	4	4	5	4	5	5	5	5	5	5	5	4	4	5	3	5	5	5	5	5	4	5	5	4	4	4	5	5	3	5	4	5
5	5	5	5	5	5	5	5	5	5	5	4	5	2	3	5	5	5	5	5	4	4	4	4	4	3	4	4	4	4	4	4	3	3	4	3	5	4	5	4	4	4	4	5
5	5	5	4	4	4	5	5	5	4	4	4	5	5	5	5	4	4	5	5	5	4	5	5	5	4	5	4	4	4	4	4	4	4	3	4	4	4	4	4	4	4	4	3
5	4	5	5	5	5	5	5	5	3	5	3	5	2	3	2	5	5	4	4	5	3	4	5	5	4	4	4	5	5	4	5	3	4	4	5	3	4	4	3	5	4	5	3
4	5	4	5	4	5	5	4	4	4	5	3	5	3	4	3	5	5	4	5	3	3	5	5	4	5	4	5	4	5	5	4	3	4	5	4	3	5	5	5	4	3	5	4
4	5	5	5	4	5	4	5	4	4	4	5	5	3	4	3	2	5	4	5	3	3	4	5	5	5	4	5	4	4	5	3	5	5	3	4	3	3	4	5	4	5	4	3
4	4	4	4	3	4	4	4	3	4	4	4	5	4	4	3	3	3	4	4	3	4	4	3	3	4	3	4	4	3	4	4	4	3	3	3	3	4	3	4	4	3	4	4
3	4	4	3	4	4	3	4	3	4	4	3	3	3	4	2	3	3	3	3	4	3	3	3	4	4	4	3	4	3	4	4	4	3	4	3	3	3	4	3	4	3	4	3
4	4	5	4	3	4	3	3	4	5	4	1	5	5	5	5	4	5	4	5	5	4	1	5	4	5	5	4	3	4	5	5	5	4	3	3	5	4	3	5	5	5	3	5
4	2	3	4	3	4	3	4	3	4	3	3	5	4	4	3	3	3	4	4	3	4	4	3	3	4	3	4	4	3	4	4	4	3	3	3	3	4	3	4	4	3	4	4
4	4	5	5	5	4	5	5	4	5	5	2	5	5	5	5	4	5	4	5	5	4	1	4	5	5	4	4	5	5	4	5	5	4	3	5	3	5	4	4	3	4	5	4
5	5	4	4	4	4	5	5	4	5	5	5	5	4	4	5	3	4	4	5	5	5	5	5	5	5	5	5	4	4	4	5	5	5	5	5	4	4	4	5	5	4	4	4
5	4	4	5	5	5	5	5	3	3	3	5	5	5	5	5	5	5	5	5	5	5	5	5	5	5	5	5	5	5	5	5	5	5	5	5	5	5	5	5	4	5	5	5
4	4	4	4	5	5	5	5	3	3	3	5	5	5	4	5	4	5	3	5	5	5	4	4	4	5	4	4	4	4	5	5	3	5	4	5	5	5	5	5	4	5	4	5
5	5	5	5	5	5	4	4	5	5	5	5	5	4	4	5	5	4	5	4	5	4	5	5	5	5	5	5	5	5	5	4	4	4	5	5	5	5	5	5	5	5	5	5
5	5	4	3	5	4	4	4	5	5	5	5	5	5	4	4	5	4	5	5	5	5	5	5	5	5	4	3	3	3	5	3	5	5	5	4	3	3	3	5	4	3	3	3
5	5	5	5	5	5	5	5	4	4	4	5	5	5	4	4	5	3	3	3	4	5	4	3	5	5	5	3	3	3	5	4	4	2	2	5	5	5	5	5	5	4	4	5
5	5	5	5	5	5	5	5	4	5	4	5	5	5	5	5	5	4	5	5	4	4	5	5	5	5	5	5	4	5	5	5	4	5	4	5	3	3	3	5	4	5	5	5
5	5	4	4	5	4	5	5	4	5	5	4	5	5	5	4	4	4	4	4	4	4	5	5	5	5	5	5	3	5	4	5	4	5	4	4	5	5	5	4	4	3	4	4
5	5	5	4	4	5	5	5	4	4	4	5	5	4	5	3	2	2	3	5	4	4	4	5	5	5	5	5	5	3	3	5	4	4	5	4	5	3	5	3	3	3	2	1
5	5	4	5	5	5	5	5	5	5	5	5	5	5	5	4	5	5	5	5	4	5	5	5	5	5	5	5	5	5	5	4	4	5	4	5	4	5	5	5	5	4	5	5
4	3	4	3	4	5	5	5	3	4	3	4	5	4	3	4	3	2	3	4	5	4	4	5	5	4	4	5	5	4	5	5	3	4	5	4	4	3	2	3	4	3	4	4
4	4	4	4	5	5	4	5	4	3	3	3	4	4	3	3	2	3	3	4	3	4	4	4	4	3	3	4	4	4	4	3	3	4	4	3	3	4	3	4	3	3	4	4
2	2	4	3	2	3	3	4	4	4	3	3	5	4	4	2	4	4	4	5	4	5	4	4	4	4	4	2	2	4	3	4	4	4	4	4	4	4	3	4	4	4	5	5
4	3	3	4	4	4	4	4	4	3	3	3	5	4	4	4	4	4	3	4	3	4	4	3	3	4	4	4	3	4	4	4	3	3	3	4	3	2	3	3	3	3	3	3
3	4	5	3	4	3	4	5	4	3	5	4	3	3	4	4	3	4	3	4	5	3	3	2	3	4	4	3	4	5	3	3	4	3	4	3	3	3	3	3	3	4	3	5
4	4	4	5	5	4	5	5	4	4	4	4	5	5	5	4	4	4	5	4	4	3	4	4	4	4	5	4	5	5	4	4	4	4	5	2	3	4	3	4	4	4	5	5
4	4	5	5	5	5	5	5	5	4	4	5	5	3	4	4	5	5	5	4	4	4	5	5	4	4	5	4	3	4	4	5	5	4	4	5	5	5	4	5	4	5	5	5
4	3	4	3	3	3	4	5	2	3	4	5	5	5	5	5	5	3	3	3	3	3	2	2	3	3	3	3	3	3	3	3	5	4	4	3	3	3	3	3	3	3	3	3
4	4	4	4	4	4	5	5	4	4	2	4	5	4	4	4	3	4	4	4	3	5	4	4	4	4	4	4	4	3	4	4	4	3	4	3	4	4	3	4	4	3	5	5
4	4	5	3	4	5	5	4	3	3	4	4	5	3	4	2	2	4	3	3	3	3	3	3	3	4	4	4	4	5	4	4	4	3	4	3	4	4	4	4	4	3	4	5
3	2	3	3	3	2	4	4	4	4	3	3	4	3	5	4	4	4	3	5	2	3	3	5	4	4	4	1	3	1	2	4	3	4	4	4	3	4	4	4	5	2	2	3
4	3	4	4	5	3	4	4	5	4	4	5	2	4	4	4	5	5	3	3	4	3	3	4	2	4	4	4	4	5	5	5	5	3	5	3	4	5	3	5	4	5	1	3
5	5	5	5	5	5	5	5	4	5	5	5	5	5	5	5	5	4	5	5	5	5	4	4	5	5	5	4	5	5	5	4	5	5	5	5	4	5	5	4	4	4	4	5
5	5	5	5	5	5	5	5	5	5	5	5	5	5	5	5	5	5	5	5	5	5	5	5	5	5	5	5	5	5	5	5	5	5	5	5	5	5	5	5	5	5	5	5
5	5	4	3	3	4	4	4	5	5	5	5	5	4	3	5	4	3	4	2	2	5	5	4	3	2	5	4	4	4	5	3	4	4	5	3	4	4	3	5	5	4	5	5
3	2	1	5	5	5	5	5	3	4	5	4	5	5	5	5	2	2	3	2	2	2	5	5	5	5	5	2	1	2	3	5	5	5	5	2	2	2	5	5	5	5	5	5
5	5	5	2	3	4	4	5	5	5	5	5	5	5	5	4	5	4	3	5	3	2	5	5	3	3	4	4	4	5	5	3	4	4	4	5	5	5	4	5	3	4	5	5
5	5	5	4	4	4	4	4	4	5	5	4	5	5	5	4	5	4	4	4	3	3	5	5	5	5	4	5	5	5	4	5	4	4	5	4	5	5	4	4	4	4	5	4
4	5	5	5	4	4	3	5	4	5	4	5	5	5	4	4	4	5	4	5	5	4	4	5	4	5	5	4	4	5	5	5	4	4	4	3	5	5	5	5	5	5	5	5
5	5	5	5	5	4	4	4	5	5	4	5	5	5	5	2	3	2	3	5	4	5	5	5	5	5	5	5	5	5	5	5	5	4	4	4	5	5	5	3	4	4	4	4
4	5	4	4	5	5	5	5	5	3	5	5	5	5	5	5	5	5	4	4	4	5	3	3	3	4	4	5	5	5	5	5	4	4	4	5	5	5	5	4	5	4	5	5
4	5	3	5	4	2	5	5	5	5	5	5	5	5	4	4	3	4	4	4	4	5	5	5	5	5	5	5	4	5	5	4	5	5	5	5	5	5	4	4	4	4	4	4
4	4	2	2	4	3	3	3	5	5	5	4	5	3	5	5	5	5	4	3	2	4	5	4	5	5	5	5	5	4	3	4	4	3	5	4	3	3	3	5	5	4	4	3
4	3	4	3	4	2	4	3	5	4	4	3	5	5	4	4	4	4	4	4	3	3	2	3	4	4	3	3	4	4	4	3	2	3	3	4	3	3	4	4	4	3	4	4
5	5	4	4	5	5	4	5	5	5	5	5	5	5	5	5	5	5	4	4	3	4	4	4	5	5	4	4	4	3	4	4	4	4	4	3	4	3	4	4	4	5	5	5
4	5	4	4	3	4	4	4	5	4	5	5	5	5	5	4	5	5	4	4	3	3	5	3	5	5	5	4	5	5	5	4	4	5	5	3	4	3	4	4	4	5	5	4
4	4	4	4	4	5	5	5	4	5	4	4	5	4	5	5	5	5	5	5	5	5	4	5	5	5	5	5	5	4	4	5	5	5	4	5	5	4	4	5	5	5	5	4
4	5	5	5	5	5	5	4	5	5	5	5	5	5	5	4	3	4	4	5	4	4	5	3	5	5	3	4	4	4	4	5	3	5	5	4	4	4	5	5	5	4	4	5
5	5	4	4	4	4	5	4	4	5	5	5	5	5	5	3	3	4	4	4	5	5	4	5	5	5	5	5	5	4	5	4	3	4	4	5	5	5	3	5	5	4	3	3
4	5	5	5	4	4	4	5	5	5	4	5	5	4	3	4	4	4	5	5	5	5	5	4	4	4	4	5	5	5	5	5	5	5	4	5	5	4	5	4	5	5	5	5
4	5	5	5	4	5	4	4	5	5	5	5	5	5	5	4	5	5	4	4	5	4	5	5	4	4	3	4	4	4	4	4	5	4	5	5	4	5	4	5	5	5	5	4
5	4	5	5	5	5	5	5	4	4	5	5	5	5	4	5	5	5	5	5	5	4	4	4	4	5	3	5	5	5	5	4	4	5	5	4	5	4	4	4	4	4	4	5
3	4	3	4	3	4	3	3	2	3	4	4	3	4	4	3	3	4	2	3	4	3	3	4	3	3	2	4	3	3	4	2	4	2	3	3	4	2	4	2	4	2	3	4
4	4	4	5	4	5	5	5	4	4	5	4	4	3	4	4	4	4	4	4	4	4	4	4	4	4	4	4	4	4	4	4	4	4	4	4	4	4	4	4	4	4	4	4
2	3	2	2	2	2	2	1	1	1	1	2	1	2	2	2	3	3	3	3	2	3	3	3	2	2	2	3	1	2	3	3	2	2	3	2	2	3	2	2	2	2	2	2
4	3	4	4	4	4	4	4	3	3	3	3	4	4	4	4	4	3	4	4	3	4	3	4	3	4	4	3	4	4	4	4	4	3	4	4	4	4	4	4	4	4	4	4
4	4	3	3	4	4	3	4	3	4	3	3	4	3	4	4	5	4	4	4	4	4	3	5	4	3	5	4	3	3	4	3	3	2	3	4	3	4	3	3	4	3	4	3
2	2	2	3	3	4	2	3	3	3	3	3	2	4	3	3	2	2	3	4	3	3	3	3	3	4	4	3	2	4	4	3	3	4	3	4	2	2	2	3	3	3	3	3
4	4	4	5	4	4	4	4	4	4	4	4	5	3	4	3	4	4	3	4	3	4	3	3	3	4	4	3	5	4	5	3	3	4	3	3	3	3	3	4	4	4	4	4
5	5	5	5	5	5	5	5	5	5	5	5	3	5	5	5	5	5	5	5	5	5	5	5	5	5	5	5	5	5	5	5	5	5	5	5	5	5	5	5	5	5	5	5
2	4	3	2	5	5	5	5	3	2	2	3	5	5	5	5	3	5	5	5	5	5	5	5	5	3	2	4	4	4	5	5	5	5	5	5	5	5	5	3	5	3	4	4
5	4	5	4	4	3	4	3	4	5	5	5	3	2	3	4	3	4	4	4	4	3	5	5	2	4	5	4	3	3	4	5	5	5	5	5	5	5	5	5	5	4	3	4
5	5	5	5	5	4	2	5	4	5	5	5	5	5	5	5	5	5	4	3	4	5	5	4	4	5	5	5	5	4	5	5	5	5	5	5	5	5	5	4	4	4	3	4
2	2	2	2	2	4	2	2	1	3	2	3	2	4	4	5	1	4	2	1	4	3	2	2	3	4	5	4	4	4	4	4	1	3	4	2	2	2	3	4	4	3	2	1
5	5	5	5	5	5	5	5	5	5	5	5	4	4	4	4	4	5	5	5	5	5	3	5	5	5	5	5	5	5	5	5	5	3	3	5	5	5	5	5	5	5	5	5
5	5	5	5	5	5	5	5	5	5	5	5	5	5	4	5	3	5	1	5	5	1	5	5	5	5	5	5	5	1	5	5	1	4	5	4	5	5	5	1	5	1	1	1
5	5	5	5	5	5	5	5	4	5	5	4	5	5	4	5	5	3	5	5	3	4	4	5	4	5	5	5	5	4	5	5	5	5	5	3	4	5	4	5	4	5	4	4
4	4	3	4	3	4	4	4	4	4	4	4	3	3	3	3	3	4	4	3	4	3	4	3	4	4	5	4	4	5	4	3	4	4	4	4	3	4	4	4	4	2	4	4
4	3	4	4	3	3	4	4	3	2	5	4	3	5	5	3	5	5	5	5	1	3	3	4	3	4	5	4	3	3	3	4	4	3	4	1	3	5	5	3	3	2	3	3
3	4	4	4	4	4	4	4	5	4	4	4	4	5	5	3	4	4	4	4	3	4	5	5	5	3	5	5	4	5	5	2	3	4	3	3	3	3	4	5	4	4	5	5
4	4	5	5	4	3	4	2	5	4	3	4	5	5	5	3	2	5	5	5	4	5	3	2	2	3	5	3	5	5	5	3	3	2	4	3	5	2	2	4	5	1	4	4
5	5	5	5	5	5	5	5	5	5	5	5	4	4	4	4	4	4	4	5	5	5	4	3	3	4	5	5	5	5	5	2	4	4	4	1	5	4	4	5	5	4	5	5
5	5	2	5	4	5	5	5	2	1	5	3	5	2	4	2	3	4	3	5	2	4	2	3	4	3	4	3	5	5	4	1	3	4	3	5	5	3	2	5	2	5	5	5
2	3	2	2	3	2	2	1	1	3	2	3	2	4	1	3	1	1	2	4	4	4	2	2	2	3	1	3	2	2	3	2	1	1	2	3	2	2	1	3	1	1	1	2
3	2	4	3	2	2	3	2	5	5	4	4	4	4	3	3	4	3	4	4	5	5	3	4	3	3	4	4	4	3	3	4	4	4	4	3	1	3	3	5	4	4	4	4
4	5	2	2	2	3	3	3	3	2	3	3	2	3	3	2	3	3	2	3	2	2	3	3	2	3	2	3	4	4	4	2	3	3	3	2	2	3	2	2	2	2	2	3
3	4	3	3	3	3	3	3	4	4	4	4	3	3	4	3	2	4	3	4	3	3	2	3	3	3	2	4	3	3	3	3	3	2	2	3	3	3	3	2	3	3	4	3
5	5	5	5	5	5	5	5	5	5	5	5	2	5	5	5	5	4	5	5	5	5	5	5	5	5	5	5	5	5	5	5	5	5	5	5	5	5	5	5	5	5	5	5
5	5	5	5	5	5	5	5	5	5	5	5	5	4	3	4	5	5	5	5	4	5	5	5	5	5	5	5	5	5	5	5	4	5	5	5	5	5	5	5	5	5	5	5
4	4	4	4	4	2	3	2	1	1	3	3	2	3	2	4	2	3	2	4	4	4	2	2	4	4	4	2	2	2	2	3	2	4	4	4	4	4	4	4	4	2	4	2
1	1	1	1	1	1	3	2	2	1	1	1	1	1	1	3	2	2	3	1	1	1	1	3	2	2	2	1	1	2	1	4	2	2	2	5	5	4	3	2	2	3	3	2
4	2	5	3	2	3	2	3	1	4	5	2	2	1	2	4	3	5	4	1	1	4	5	5	3	5	5	2	3	2	3	4	3	3	4	3	2	2	3	3	3	3	2	5
5	5	4	5	5	5	5	5	4	3	4	4	4	4	4	3	5	3	5	5	4	4	5	5	4	4	4	4	4	4	5	5	4	5	4	4	4	4	5	3	4	5	5	5
4	5	4	5	4	5	5	4	4	3	3	3	5	4	3	4	4	4	4	5	5	4	3	3	4	5	5	4	4	4	5	4	5	3	4	4	3	3	4	5	4	4	4	3
4	5	4	5	4	5	5	4	4	5	3	4	5	4	3	4	4	4	5	5	4	4	3	3	4	5	5	4	4	4	5	4	5	3	4	4	3	3	4	5	4	4	4	4
3	2	2	2	2	2	3	2	2	3	2	3	3	2	3	3	2	3	1	4	2	2	1	2	2	2	2	2	1	2	2	1	2	1	1	3	2	1	2	1	2	1	2	3
1	1	3	1	1	3	3	3	2	2	3	4	3	1	3	5	1	1	1	1	1	1	3	3	1	3	1	3	2	3	3	1	2	1	3	2	1	2	1	2	2	1	1	2
5	3	3	3	3	3	3	3	3	3	4	5	2	3	3	4	4	4	5	4	5	4	3	4	3	3	4	4	3	5	5	3	5	3	4	4	2	3	4	3	3	3	3	3
4	3	5	4	4	5	4	3	5	5	5	5	5	5	5	5	5	5	5	5	5	5	5	5	5	5	5	5	5	5	5	5	5	5	5	5	3	5	5	5	5	5	5	5
3	3	3	4	2	4	3	3	3	4	2	4	3	4	2	3	4	3	3	2	4	3	3	3	3	4	4	3	3	3	3	2	4	3	3	4	3	3	4	3	3	3	4	4
4	4	4	4	4	4	4	4	4	4	4	4	4	4	4	4	4	4	4	4	4	4	4	4	4	4	4	4	4	4	4	4	4	4	4	4	4	4	4	4	4	4	4	4
1	1	5	2	4	2	1	4	3	3	3	4	5	2	1	4	5	4	5	4	2	4	2	2	1	1	2	5	2	1	3	4	4	3	5	3	4	3	5	3	4	4	5	2
4	4	4	4	4	4	4	4	4	4	4	4	4	4	4	4	4	4	4	4	4	4	4	4	3	4	4	4	4	4	4	4	4	4	3	3	4	4	4	4	4	4	5	4
3	3	5	4	4	5	5	4	4	3	4	3	5	5	5	2	5	5	5	1	3	1	4	4	4	4	4	4	5	5	5	3	3	3	4	3	2	2	2	4	4	4	3	5
3	3	4	4	4	4	4	4	2	3	4	4	3	4	4	3	4	4	5	4	3	5	3	3	5	4	4	3	3	4	4	4	3	4	3	3	4	4	3	4	3	3	4	4
1	2	1	1	1	1	1	3	2	2	2	2	1	3	2	1	3	3	1	1	1	1	1	1	3	1	2	3	2	2	1	1	1	1	1	1	1	1	1	2	2	2	2	1
5	4	4	5	5	5	5	4	5	4	5	4	4	4	4	4	2	5	5	5	2	5	4	5	4	5	5	5	5	5	5	4	5	5	4	3	3	2	4	5	4	3	5	5
4	4	4	4	4	4	4	5	2	3	4	4	5	5	4	4	4	4	2	4	3	3	4	4	4	2	4	3	4	4	4	5	4	4	4	3	3	3	1	5	3	4	2	3
5	5	5	5	1	1	1	1	5	1	1	1	5	5	5	5	1	5	5	5	5	5	5	5	5	5	5	5	5	5	5	1	1	5	1	5	1	1	1	5	5	5	5	5
5	5	5	5	5	5	5	5	5	5	3	3	1	5	5	5	5	5	1	5	3	5	3	5	5	5	5	5	5	5	5	1	1	1	1	4	4	1	1	5	5	5	5	5
3	3	3	3	3	3	3	3	3	3	3	3	1	2	1	2	3	3	3	3	3	3	3	3	3	3	3	3	3	3	3	3	3	3	3	3	3	3	3	3	3	3	3	3
1	2	3	1	1	2	2	2	1	1	2	2	3	5	3	5	2	2	3	1	2	3	1	3	1	3	1	1	2	2	1	1	3	3	2	4	5	1	3	2	3	1	1	2
3	3	3	3	3	3	3	3	3	3	2	2	2	1	2	1	2	3	2	2	2	2	2	2	2	3	2	3	3	3	2	3	2	1	1	2	3	3	3	4	4	5	5	3
4	4	4	4	4	4	4	4	4	4	4	4	3	3	4	3	3	3	3	4	2	5	2	4	2	3	3	3	1	4	4	4	3	4	3	4	3	3	4	4	4	3	3	2
5	5	5	5	5	5	5	5	5	5	5	5	4	4	5	5	4	5	5	5	5	5	5	4	5	4	5	5	5	5	5	4	5	4	5	5	5	4	4	5	5	5	5	5
3	5	5	4	5	3	5	4	4	5	5	4	4	5	4	4	5	4	5	5	4	4	5	5	4	5	5	5	3	5	4	5	4	5	4	5	4	5	5	5	4	5	4	5
5	5	5	4	4	4	4	5	4	4	4	4	4	4	4	4	4	4	4	4	4	4	4	4	4	4	4	4	4	4	4	4	4	4	4	4	4	4	4	4	4	4	4	4
4	4	4	4	4	5	5	5	4	4	4	4	4	4	4	4	4	4	4	4	4	4	4	4	4	4	4	4	4	4	4	4	4	4	4	4	4	4	4	4	4	4	4	4
